# Supplementary material for: Normal dynactin complex function during synapse growth in Drosophila requires membrane binding by Arfaptin
Source: PubMed Central journal article supplement — Mol Biol Cell. 2013 Jun 1;24(11):1749–64. doi: 10.1091/mbc.E12-09-0697 (PMC3667727; doi:10.1091/mbc.e12-09-0697), 2013-06-01
Supplement: supp_E12-09-0697v1_CombinedSupMats.pdf [file supp_E12-09-0697v1_CombinedSupMats.pdf]

**Supplemental Figure S1:** (A) Immunoblot analysis of third instar larval homogenate using anti-Arfip antibody demonstrates that D42-Gal4 can drive the expression of Arfip from the *arfip*<sup>P1</sup> insertion resulting in increases Arfip protein level by ~50-60% compared to wild type. Graph represents the quantification of Arfip protein normalized to actin of the indicated genotypes. (B) Immunoblots of co-immunoprecipitation analysis from S2 cells co-expressing FLAG-DNGLued and HA-Arfip fusion proteins incubated with anti-FLAG antibody coated beads. Inclusion of a competing FLAG peptide during incubation with beads completely abolished binding of Arfip-HA. Cell lysate of S2 cells co-expressing FLAG-DNGLued and HA-Arfip is shown as input. (C) Immunoblots of co-immunoprecipitation analysis from S2 cells co-expressing Arfip<sup>BAR</sup>-FLAG and Arf6-HA fusion proteins incubated with anti-FLAG antibody coated beads. Inclusion of a competing FLAG peptide during incubation with beads completely abolished binding of Arf6-HA. Analysis of S2 cells expressing only Arf6-HA showed very low levels of non-specific binding to FLAG beads. Cell lysate of S2 cells co-expressing Arfip<sup>BAR</sup>-FLAG and Arf6-HA or only Arf6-HA shows equivalent amount of protein materials added in each co-immunoprecipitation experiment.

**Supplemental Movie S1: Live imaging of axonal transport of syb-GFP vesicles in wild type larvae.** Representative movie of axonal tracts from a *OK6/UAS-syb-GFP; +/+* larvae. The larval VNC is located to the left of the movie.

**Supplemental Movie S2: Live imaging of axonal transport of syb-GFP vesicles in *arfip*<sup>12/71</sup> mutant larvae.** Representative movie of axonal tracts from a *OK6/UAS-syb-GFP; arfip*<sup>12/71</sup> larvae. The larval VNC is located to the left of the movie.

## Supplemental Material

**Table S1: Molecular and genetic information for inserts altering synapse growth**

| Insertion Genotype                    | Mutant Type <sup>1</sup> | Mutant Class <sup>2</sup> | Insert <sup>3</sup> | Predicted Gene <sup>4</sup> | Predicted function <sup>5</sup> |
|---------------------------------------|--------------------------|---------------------------|---------------------|-----------------------------|---------------------------------|
| <b>Enhancers<sup>1</sup></b>          |                          |                           |                     |                             |                                 |
| <i>P{EP}CG17184<sup>EY11874</sup></i> | E2                       | L/G                       | 5' UTR              | <i>CG17184</i>              | Membrane trafficking            |
| <i>P{XP}CG17184<sup>d04252</sup></i>  | E2                       | L                         | 3' UTR              | <i>CG17184</i>              | Membrane trafficking            |
| <i>P{EP}EY12448</i>                   | E2                       | n.d.                      | n.d.                | none                        | n.a.                            |
| <i>PBac{PB}fan<sup>c04756</sup></i>   | E2                       | L/G                       | 5'                  | <i>fan</i>                  | vesicle-associated              |
| <i>P{EP}EY20330</i>                   | E2                       | G                         | 5'                  | <i>CG13813</i>              | Kinase activity                 |
| <i>P{EP}klar<sup>EY01576</sup></i>    | E1                       | L                         | CDS                 | <i>klar</i>                 | MT transport                    |
| <i>P{EP}bbg<sup>EY05191</sup></i>     | E1                       | L                         | CDS                 | <i>bbg</i>                  | Disc development                |
| <i>PBac{PB}Sirt2<sup>c03323</sup></i> | E1                       | L/G                       | 5' UTR              | <i>Sirt2</i>                | Histone deacetylase             |
| <i>P{EP}EY06888</i>                   | E1                       | n.d.                      | n.d.                | none                        | n.a.                            |
| <i>P{EP}GRHR<sup>EY11371</sup></i>    | E1                       | L/G                       | 5' UTR              | <i>GRHR</i>                 | Peptide receptor                |
| <b>Suppressors<sup>1</sup></b>        |                          |                           |                     |                             |                                 |
| <i>P{EP}nesd<sup>EY11086</sup></i>    | S3                       | L/G                       | 5' UTR              | <i>nesd</i>                 | CHO binding                     |
| <i>P{EP}Coop<sup>EY13293</sup></i>    | S3                       | L/G                       | 5' UTR              | <i>Coop</i>                 | RNA transcription               |
| <i>P{EP}CG42575<sup>EY04050</sup></i> | S2                       | L/G                       | 5' UTR              | <i>CG42575</i>              | Transporter Activity            |
| <i>P{EP}B4<sup>EY14645</sup></i>      | S2                       | L                         | Intron              | <i>B4</i>                   | Disc development                |
| <i>P{EP}CG4562<sup>EY09703</sup></i>  | S1                       | L/G                       | 5' UTR              | <i>CG4562</i>               | Transporter Activity            |
| <i>P{EP}TM9SF4<sup>EY00960</sup></i>  | S1                       | L/G                       | 5' UTR              | <i>CG7364</i>               | Transporter Activity            |

All data collected from P-element screen consisting of the indicated single copy insertion in trans to the *D42*, *DN<sup>Glued</sup>* recombinant chromosome. Insertion genotypes obtained from Flybase.org.

<sup>1</sup>– Refers to the effects of inserts on viability when in trans to *D42*, *DN<sup>Glued</sup>* at 25C. Enhancers (E) *enhance* the effects of the *D42*, *DN<sup>Glued</sup>* allele on viability, and suppressors (S) have the opposite effects on viability. 1= weakest, 3= strongest. The lethality due to one copy of the *D42*, *DN<sup>Glued</sup>* is ~30%. Note that E2 = 100% lethality and E1 = < 60% lethality. S3 = 100% viability.

<sup>2</sup>–Predicted mutant class of insertion based on P-element type and location of insertion. L equals loss-of-function and G equals gain-of-function. Because many of the P-elements landed in 5' UTR, inserts could be either L or G (L/G).

<sup>3</sup>– Refers to the position of the insert in the reported gene based on genetic information provided by Flybase.org. UTR=untranslated mRNA, CDS=coding sequence of mRNA. 5' refers to insertion site relative to gene.

<sup>4</sup>– Candidate genes predicted by the proximal location of insert and genes determined from the physical map data present at Flybase.org for each insert. # indicates insert location verified by iPCR.

<sup>5</sup>– Gene function data obtained from Flybase.org for gene listed in predicted gene column.

---

**Table S2: Syb-GFP vesicle axonal transport analyses**

---

| <b>Genotype<sup>1</sup></b>   | <b>n<sup>2</sup></b> | <b>% particles moving<sup>3</sup></b> | <b>Axonal Density<sup>4</sup></b> |
|-------------------------------|----------------------|---------------------------------------|-----------------------------------|
| wt                            | 43<br>(8)            | 55.8<br>(76/136)                      | 0.0673<br>(0.0037)                |
| <i>arfip</i> <sup>12/71</sup> | 56<br>(11)           | 57.6<br>(90/156)                      | 0.0586<br>(0.0028)                |

---

<sup>1</sup>-Refers only to the genotype of 3rd chromosome, both genotypes have the following 2<sup>nd</sup> chromosome genotype: *OK6-Gal4/UAS-syb-GFP*.

<sup>2</sup>-Indicates the total number of axons analyzed for movement and density. The number of animals analyzed is presented within the parenthesis.

<sup>3</sup>-Represents the percentage of particles within a given region of interest that move in either direction during acquisition.

<sup>4</sup>-Represents the average number of syb-GFP transport vesicles per length of axon (particle/um). Values are not significantly different between wt and *arfip* mutants.

---

## Supplemental Figure S1:

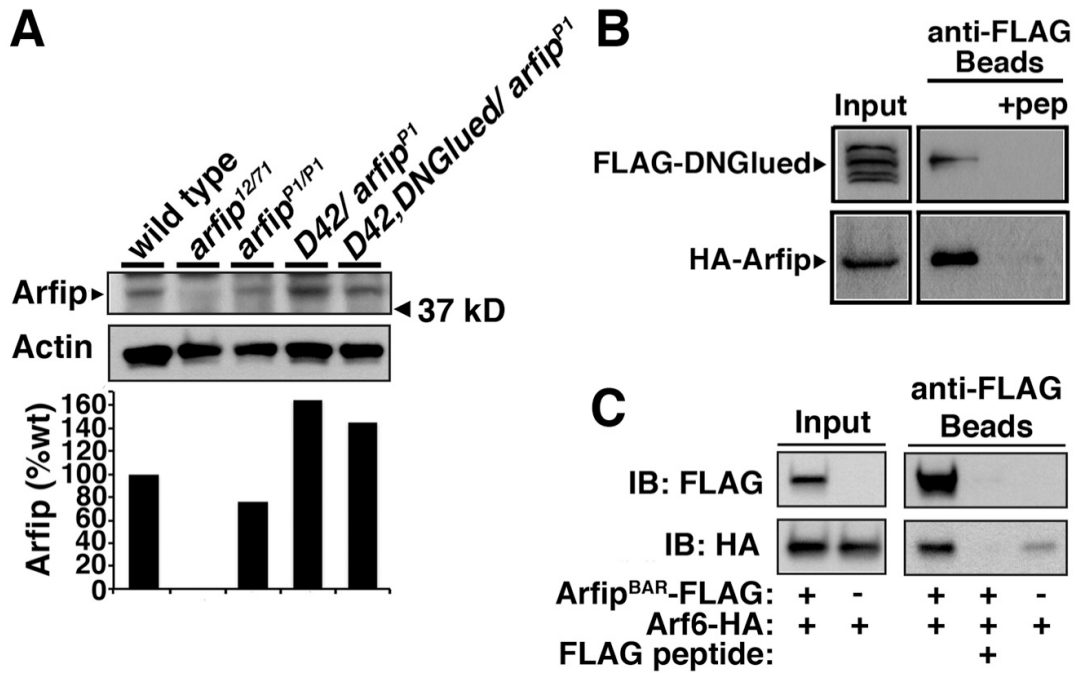

**Supplemental Figure S1:** (A) Immunoblot analysis of third instar larval homogenate using anti-Arfip antibody demonstrates that D42-Gal4 can drive the expression of Arfip from the arfip<sup>P1</sup> insertion resulting in increases Arfip protein level by ~50-60% compared to wild type. Graph represents the quantification of Arfip protein normalized to actin of the indicated genotypes. (B) Immunoblots of co-immunoprecipitation analysis from S2 cells co-expressing FLAG-DNGLued and HA-Arfip fusion proteins incubated with anti-FLAG antibody coated beads. Inclusion of a competing FLAG peptide during incubation with beads completely abolished binding of Arfip-HA. Cell lysate of S2 cells co-expressing FLAG-DNGLued and HA-Arfip is shown as input. (C) Immunoblots of co-immunoprecipitation analysis from S2 cells co-expressing Arfip<sup>BAR</sup>-FLAG and Arf6-HA fusion proteins incubated with anti-FLAG antibody coated beads. Inclusion of a competing FLAG peptide during incubation with beads completely abolished binding of Arf6-HA. Analysis of S2 cells expressing only Arf6-HA showed very low levels of non-specific binding to FLAG beads. Cell lysate of S2 cells co-expressing Arfip<sup>BAR</sup>-FLAG and Arf6-HA or only Arf6-HA shows equivalent amount of protein materials added in each co-immunoprecipitation experiment.
